# Supplementary material for: Sellar Glomus Tumor Misdiagnosed as Pituitary Adenoma: A Case Report and Review of the Literature
Source: Front Endocrinol (Lausanne). 2022 May 4;13:895054. doi: 10.3389/fendo.2022.895054 (PMC9114742; doi:10.3389/fendo.2022.895054)
Supplement: Supplementary file 1 [file Table_1.xlsx]

## Sheet: Sheet1
Primary antibodies	catalog no.	vendors
Vimentin	ab137321	Abcam
SMA	ab223068	Abcam
SYN	5297	Cell Signaling Technology
h-caldesmon	ab233987	Abcam
Desmin	PA5-16705	Invitrogen
Collagen IV	ab6311	Abcam
CD34	ab54208	Abcam
